RESEARCH ARTICLE

# The current status of syphilis prevention and control in Jiangsu province, China: A cross-sectional study

Yuan-Fang Chen<sup>1</sup>, Jian-Ping Ding<sup>1</sup>, Hong-Jing Yan<sup>1</sup>, Jing Lu<sup>1</sup>, Ping Ding<sup>1</sup>, Guo-Hong Chen<sup>1</sup>, Jian-Jun Li<sup>1</sup>, Xi-Ping Huan<sup>1</sup>, Hai-Tao Yang<sup>2</sup>, Wei-Ming Tang<sup>3\*</sup>, Geng-Feng Fu<sup>1\*</sup>

**1** Jiangsu Provincial Center for Disease Control and Prevention, Nanjing, China, **2** Jiangsu Institute of Parasitic Diseases, Wuxi, China, **3** University of North Carolina Project-China, Guangzhou, China

\* [weimingtangscience@gmail.com](mailto:weimingtangscience@gmail.com) (WMT); [fugf@jscdc.cn](mailto:fugf@jscdc.cn) (GFF)

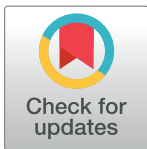

## Abstract

### Objective

To analyze the midterm evaluation data from the National Syphilis Prevention and Control Plan (2010–2020) and evaluate the current status of syphilis prevention and control in Jiangsu province, China.

### Methods

We collected data via (1) field surveys conducted in 2015 and (2) data recorded in existing syphilis surveillance systems. We conducted descriptive statistical analysis to evaluate the current landscape of syphilis control initiatives and their potential effect in syphilis control.

### Results

The incidence of all cases of syphilis decreased from 2010 (32.3 per 100,000) to 2015 (30.1 per 100,000), with an annual growth of -1.17% ( $\chi^2_{\text{trend}} = -7.52$ ,  $P < 0.001$ ) in Jiangsu province. The incidence of primary and secondary syphilis and congenital syphilis both decreased significantly from 2010 to 2015. The average awareness rate of syphilis knowledge among professional personnel was 95.4% (3781/3963). Rural residents had the lowest awareness rate (83.5%, 1875/2245) and commercial sex workers had the highest awareness rate (92.1%, 7804/8474) in 2015. Only 47.8% (33908/70894) of patients received provider-initiated syphilis counseling and testing (PISTC) services in sexually transmitted disease (STD) clinics, but 94.5% (87927/93020) of all syphilis patients received free testing for syphilis. Overall, 97.2% (9378/9648) of syphilis reported cases of syphilis at medical institutions were confirmed to be accurate, and 92.2% (5850/6345) of patients diagnosed with syphilis at medical institutions received treatment with penicillin.

## OPEN ACCESS

**Citation:** Chen Y-F, Ding J-P, Yan H-J, Lu J, Ding P, Chen G-H, et al. (2017) The current status of syphilis prevention and control in Jiangsu province, China: A cross-sectional study. PLoS ONE 12(8): e0183409. <https://doi.org/10.1371/journal.pone.0183409>

**Editor:** Junjie Xu, China Medical University, CHINA

**Received:** April 21, 2017

**Accepted:** August 3, 2017

**Published:** August 24, 2017

**Copyright:** © 2017 Chen et al. This is an open access article distributed under the terms of the [Creative Commons Attribution License](https://creativecommons.org/licenses/by/4.0/), which permits unrestricted use, distribution, and reproduction in any medium, provided the original author and source are credited.

**Data Availability Statement:** All relevant data are within the paper and its Supporting Information files.

**Funding:** The authors received no specific funding for this work.

**Competing interests:** The authors have declared that no competing interests exist.

## Conclusion

The syphilis incidence rate in Jiangsu has decreased in recent years, but remains at a high level. It is essential to promote PISTC services to improve knowledge of syphilis and rates of testing and treatment in Jiangsu province.

## Introduction

In 2016, the World Health Organization (WHO) estimated that there are 5.6 million new cases of syphilis infections each year, with most cases occurring in developing countries [1–2]. Jiangsu, a coastal province in eastern China, has recently experienced a rise in the prevalence of sexually transmitted infections including syphilis [3]. According to China's information system for disease control and prevention statistics, syphilis became the third most common reported infectious diseases in Jiangsu province since 2007, after tuberculosis and hepatitis B. From 2010 to 2016, 24,000 syphilis cases were reported in the province each year. There also exist several high-risk populations: the prevalence of syphilis has been estimated to be as high as 4.88% among female sex workers [4], 20.34% among men who have sex with men (MSM) [3], and 1.58%~4.93% [5–7] among rural migrants in Jiangsu province. The syphilis epidemic in these high-risk groups also poses a serious threat to the general population [8].

In response to an initiative established by WHO, the Chinese Ministry of Health (MOH) launched the National Program for Prevention and Control of Syphilis in China in June 2010 [9–10]. This program aims to decrease primary and secondary syphilis and eliminate congenital syphilis, with a specific target of less than 15 syphilis cases per 100,000 live births by 2020 [11]. To achieve this goal, Jiangsu Provincial Center for Disease Control and Prevention has augmented the national syphilis control plan with an additional comprehensive STD control plan. Initiatives include the establishment at least one medical institution per county that provides standardized medical services for syphilis patients, as well as additional STD surveillance sites in Jiangsu province.

To evaluate the potential effect of this comprehensive plan on controlling the syphilis epidemic in Jiangsu province, the Jiangsu Provincial Commission of Health and Family Planning issued and organized a midterm evaluation of the National Syphilis Prevention and Control Plan (2010–2020) in 2016. This goal of this study is to analyze data from the midterm evaluation and summarize the current status of syphilis prevention and control in Jiangsu province.

## Methods

One hundred counties and districts of cities in thirteen cities of Jiangsu province were involved in this study. To carry out this evaluation, county/district level public health bureaus collected data through existing information systems and field surveys in 2015. In order to ensure the authenticity and accuracy of the data, county (district) self-assessment, municipal review and provincial inspection work were launched. For this study, we collected de-identified surveillance data on reported cases of syphilis in 2015 as well as de-identified survey data on population awareness of syphilis.

## Surveillance data

In this study, original data were obtained through disease-monitoring systems in Jiangsu province to calculate 9 variables, including:

1. The proportion of first-detected patients in HIV counseling testing clinics and first-methadone users in methadone maintenance treatment clinics who received free testing for syphilis:

$$= \frac{\text{Numbers of first – detected patients and first – methadone users getting free testing for syphilis}}{\text{Total numbers of first – detected patients in HIV testing clinics counseling and first – methadone users in methadone maintenance treatment clinics in 2015}};$$

2. The proportion of first-detected patients and first-methadone users with positive syphilis tests who were referred to a STD clinic for syphilis professional treatment in HIV counseling and testing clinics and methadone maintenance treatment clinics:

$$= \frac{\text{Numbers of first – detected patients and first – methadone users with positive syphilis having been referred for specialized follow – up treatment}}{\text{First – detected patients and first – methadone users with positive syphilis in HIV counseling and testing clinics and methadone maintenance treatment clinics in 2015}};$$

3. The proportion of pregnant women at public medical institutions who received free syphilis testing at least once during pregnancy:

$$= \frac{\text{Numbers of pregnant women getting free testing for syphilis at least once time during pregnancy in public medical institutions}}{\text{Pregnant women in 2015}};$$

4. The proportion of syphilis-positive pregnant women at public medical institutions who received standard diagnostic and treatment services:

$$= \frac{\text{Numbers of syphilis positive women accepting standard diagnostic and treatment services}}{\text{Syphilis positive pregnant women in public medical institutions in 2015}};$$

5. The proportion of live babies born to syphilis-positive mothers who received standard syphilis diagnostic and treatment services:

$$= \frac{\text{Numbers of babies accepting standard diagnostic and treatment services}}{\text{Alive babies born to syphilis – positive mothers in 2015}};$$

6. The proportion of syphilis-positive mothers with one-year-old babies who accepted syphilis follow-up for their child during its first year of life:

$$= \frac{\text{Numbers of babies accepting follow – up in the first year of life}}{\text{One – years – old babies born to syphilis – positive mothers in 2015}};$$

7. The diagnostic accuracy rate of syphilis cases reported by medical institution: we considered each syphilis case as correctly diagnosis if the patient had records of positive tests for

both a treponema pallidum serum test and a non-treponema pallidum serum test:

$$= \frac{\text{Syphilis cases diagnosed accurate}}{\text{Sample syphilis cases reported by surveyed medical institution in 2015}};$$

8. The annual growth rate in incidence of all cases of syphilis from 2010 to 2015(%):

$$= \sqrt[6]{\frac{\text{The reported incidence rate of all cases of syphilis in 2015}}{\text{The reported incidence rate of all cases of syphilis in 2010}}} \times 100 - 100$$

9. The compound annual growth rate in incidence of primary and secondary syphilis from 2010 to 2015(%):

$$= \sqrt[6]{\frac{\text{The compound incidence rate of primary and secondary syphilis in 2015}}{\text{The compound incidence rate of primary and secondary syphilis in 2010}}} \times 100 - 100;$$

10. The annual growth rate in incidence of congenital syphilis from 2010 to 2015(%):

$$= \sqrt[6]{\frac{\text{The reported incidence rate of congenital syphilis in 2015}}{\text{The reported incidence rate of congenital syphilis in 2010}}} \times 100 - 100.$$

## Field surveys

**Awareness of syphilis-related knowledge.** The National Center for STD Control, China CDC created a questionnaire exam of 322 items on syphilis prevention, treatment and testing to evaluate the knowledge of technical staff/medical personnel (S1 Table). In each county (district), the local center for disease control and prevention (CDC), a maternity and child health care hospital, and the three medical institutions with the largest number of reported syphilis cases during 2015 were recruited. At each institution, 3 syphilis prevention and control staff, 3 syphilis testers and 3 syphilis clinicians were given the exam. For any category with fewer than 3 participants, all individuals within that group were given the exam. Participants required a score of 85% or higher to pass the exam.

The National Center for STD Control, China CDC created a survey with eight questions on knowledge of syphilis prevention intended for residents (S2 Table). This survey was conducted among urban and rural residents in each city. In order to ensure adequate representation of survey participants, the survey was administered to 200 urban residents aged 15 to 49, 150 rural residents aged 15 to 49, 100 rural-to-urban migrants over age 18, 650 commercial female sex workers over age 18, and 300 MSM over age 18. Participants who correctly answered six or more questions were considered proficient in knowledge of syphilis prevention.

**Provider-initiated syphilis testing and counseling (PISTC) services.** Three hospitals in each county with the highest number of reported syphilis cases during 2015 were included in this survey (S3 Table). To calculate this, we used the following formula designed by China CDC: PISTC proportion = the number of dermatology outpatients who were tested for syphilis in the fourth quarter / (the number of dermatology outpatients in fourth quarter × 3%).

To get the denominator, the total number of dermatology outpatients from the fourth quarter of 2015 in each selected hospital was collected. The numbers of patients being tested for syphilis in the fourth quarter of 2015 at the selected hospitals were also collected and used as nominator.

**Investigation on standard treatment of syphilis.** Long-acting penicillin is widely regarded as the best treatment for syphilis [12–13], and a long-acting penicillin prescription was considered to be the standard treatment in this study.

The top three hospitals for syphilis cases in each county (district) in 2015 were included in this study (S4 Table). We randomly selected 30 syphilis treatment prescriptions from each hospital and counted the number of prescriptions for long-acting penicillin. Since some patients with syphilis are allergic to penicillin, the Chinese CDC used 0.75 as a correction factor to account for patients with penicillin allergies. The standard treatment ratio was calculated as follows:

$$\text{Standard treatment ratio (\%)} = (\text{long-acting penicillin prescriptions}/0.75) / \text{sample syphilis treatment prescriptions} \times 100\%.$$

## Data analysis

Data were analyzed using SAS 9.3. We analyzed binary data and stratified data using the  $CMH-x^2$  test (Cochran-Mantel-Haenszel chi-squared test). We also examined the trends in reported incidence rate of syphilis from 2010 to 2015. Spatial analysis was integrated using geographic information system software (GIS 10).

## Results

### Reported incidence of syphilis

The incidence of all cases of syphilis decreased from 2010 (32.3 per 100,000) to 2015 (30.1 per 100,000), with an annual growth of -1.17% ( $x^2_{trend} = -7.52, P < 0.001$ ) (Fig 1). The combined incidence of primary and secondary syphilis decreased significantly from 21.0 per 100,000 (16259 cases) in 2010 to 13.3 per 100,000 (10615 cases) in 2015, with an annual growth rate of -7.32% ( $x^2_{trend} = -39.90, P < 0.001$ ) (Fig 1). The incidence of congenital syphilis decreased significantly from 64.1 per 100,000 live births (619 cases) in 2010 to 28.3 per 100,000 live births in 2015 (224 cases), with an annual growth rate of -12.75% ( $x^2_{trend} = -12.31, P < 0.0001$ ) (Fig 1).

### Awareness of syphilis prevention and treatment knowledge

**Professional personnel survey.** A total of 3963 professional personnel participated in the syphilis prevention, knowledge, and skills examination survey. 3781 (95.4%) of examinees passed the examination (Table 1). The awareness rate of syphilis knowledge among professional personnel was 98.5% (666/676) at the Jiangsu CDC, 94.7% (2264/2390) at the three medical institutions with most cases of syphilis, and 94.9% (851/897) at the maternity and child health care hospital. The difference among the three groups was significant ( $x^2 = 14.45, P < 0.001$ ) (Table 1). The awareness rate of syphilis knowledge was 97.1% (965/994) in syphilis prevention and control staff, 95.9% (1384/1443) in syphilis testing staff, 93.8% (1432/1526) in syphilis clinicians. The difference was significant among these groups of participants ( $x^2 = 10.56, P = 0.005$ ).

**Residents' survey.** Rural residents had the lowest rate of proficiency in knowledge of syphilis at 83.5% (1875/2245), followed by rural-to-urban migrants at 88.9% (1246/1401),

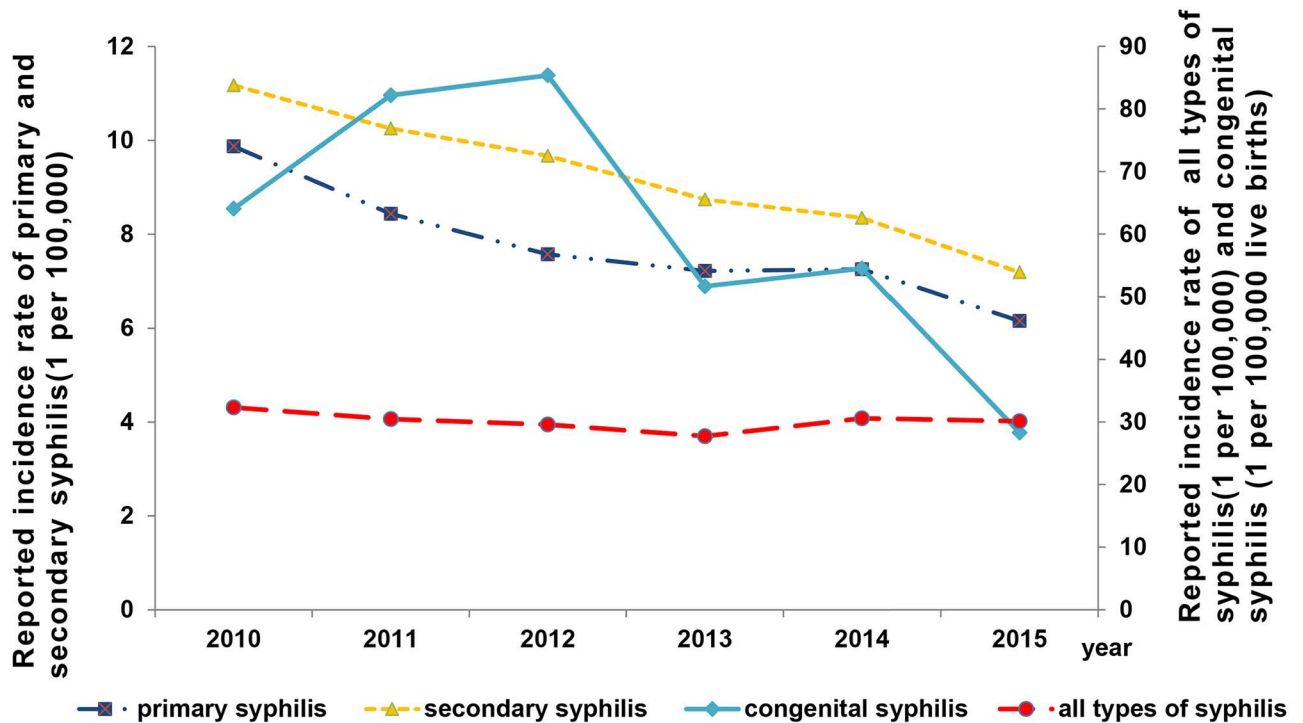

**Fig 1. The reported incidence rate of syphilis from 2010 to 2015 in Jiangsu province.** The incidence of syphilis decreased overall, and the incidence of primary and secondary syphilis and congenital syphilis both decreased significantly from 2010 to 2015.

<https://doi.org/10.1371/journal.pone.0183409.g001>

urban residents at 90.9% (2530/2784), MSM at 90.8% (3472/3824), and commercial sex workers at 92.1% (7804/8474). There were statistically significant differences in the awareness of syphilis among these groups of participants ( $\chi^2 = 155.1, P < 0.001$ ).

### PISTC services offered by medical institutions

A total of 250 dermatology hospitals and STD clinics were investigated for the rate of PISTC services offered to their patients. 47.8% (33908/70894) of patients received PISTC services in the fourth quarter of 2015, which is lower than the national standard (PISTC proportion  $\geq 80\%$ ). Of the 13 surveyed cities in the province, only 4 cities met the national assessment standard, including Taizhou (88.2%), Yangzhou (87.4%), Lianyungang (83.2%) and Huai'an (80.9%) (Table 2).

Of the 250 surveyed medical institutions, 94 (37.6%) did not meet the national assessment standard (e.g. the proportion of patients receiving PISTC services in these medical institution was less than 80%) (Table 2). There were a total of 50902 outpatients in those 94 institutions in

**Table 1. Awareness of syphilis prevention and treatment knowledge among professional personnel in Jiangsu, China, 2015 (n = 3963).**

| Participant                           | Total | CDC          |                  | Medical institutions |                  | Maternity and child health care hospitals |                  |
|---------------------------------------|-------|--------------|------------------|----------------------|------------------|-------------------------------------------|------------------|
|                                       |       | Participants | Eligible rate(%) | Participants         | Eligible rate(%) | Participants                              | Eligible rate(%) |
| Syphilis prevention and control staff | 994   | 226          | 98.7             | 538                  | 96.1             | 230                                       | 97.8             |
| Syphilis testing staff                | 1526  | 128          | 97.7             | 1032                 | 94.0             | 366                                       | 92.1             |
| Syphilis clinicians                   | 1443  | 322          | 98.8             | 820                  | 94.8             | 301                                       | 96.0             |
| Total                                 | 3963  | 676          | 98.5             | 2390                 | 94.7             | 897                                       | 94.9             |

<https://doi.org/10.1371/journal.pone.0183409.t001>

**Table 2. The PISTC among 70894 patients in 250 medical institutions with STD clinic in Jiangsu, China, 2015.**

| City         | PISTC proportion <80% |                | PISTC proportion >= 80% |               | Average PISTC proportion(%) |
|--------------|-----------------------|----------------|-------------------------|---------------|-----------------------------|
|              | STD outpatients       | Proportion (%) | STD outpatients         | Proportion(%) |                             |
| Nanjing      | 10944                 | 33.9           | 1329                    | 93.8          | 40.4                        |
| Suzhou       | 21095                 | 21.3           | 3918                    | 98.2          | 33.4                        |
| Wuxi         | 3036                  | 42.1           | 1725                    | 89.6          | 59.3                        |
| Nantong      | 1924                  | 44.4           | 1745                    | 94.4          | 68.2                        |
| Yangzhou     | -                     | -              | 1311                    | 87.4          | 87.4                        |
| Changzhou    | 3173                  | 63.9           | 1120                    | 99.0          | 73.1                        |
| Yancheng     | 591                   | 42.1           | 1165                    | 91.9          | 75.2                        |
| Zhenjiang    | 1009                  | 59.4           | 1753                    | 92.0          | 80.1                        |
| Xuzhou       | 7427                  | 21.2           | 1282                    | 92.9          | 31.8                        |
| Taizhou      | -                     | -              | 1733                    | 88.2          | 88.2                        |
| Huai-an      | 528                   | 40.5           | 1494                    | 95.1          | 80.9                        |
| Lian-yungang | 102                   | 38.2           | 689                     | 89.8          | 83.2                        |
| Suqian       | 1073                  | 24.8           | 728                     | 85.0          | 49.1                        |
| Total        | 50902                 | 30.1           | 19992                   | 93.1          | 47.8                        |

<https://doi.org/10.1371/journal.pone.0183409.t002>

the fourth quarter in 2015, and the average rate of PISTC services was only 30.1% (15305/50902). Each medical institution had an average of 200 outpatient dermatology patients per day. In the 156 institutions (62.4%) that met the national assessment standard (PISTC proportion >= 80%), 19992 people were seen for STD outpatient care during the fourth quarter in 2015, with an average PISTC coverage of 93.0% (18603/19992).

### Syphilis monitoring and detection among high-risk populations

As of 2015, there are 356 HIV counseling and testing clinics and 17 methadone maintenance treatment clinics in Jiangsu province. The proportion of first-detected patients at HIV counseling and testing clinics and first-methadone users at methadone clinics who received free testing for syphilis was 94.5% (87927/93020) throughout the province and rate of testing in each city was above 85% (Fig 2). The percentage of patients who firstly received syphilis testing at HIV clinics was 94.5% (87624/92710) and the percentage of first-methadone users who received syphilis testing at methadone maintenance treatment clinics was 97.7% (303/310).

99.7% of patients with syphilis detected in these settings were referred for specialized follow-up treatment (4425/4438), and more than 85.0% of patients in each of the 13 cities received these referrals (Fig 3). The percentages of first-detected patients at HIV clinics and first-methadone users at methadone treatment clinics with positive syphilis tests who were referred to an STD clinic for syphilis follow-up were 99.7% (4336/4348) and 98.9% (89/90), respectively.

### Prevention of mother-to-child transmission (MTCT) of syphilis

In 2015, 643,452 (99.7%) urban and 152,506 (99.8%) rural pregnant women received free testing for syphilis at least once during pregnancy. The difference among the dissimilar area was significant ( $\chi^2 = 1335.3, P < 0.001$ ) (Table 3). Of these women, 974 and 227 pregnant women with syphilis received standardized diagnostic and treatment services, representing 91.2% (974/1068) and 81.1% (227/280) of all pregnant women with syphilis, respectively. The difference among the dissimilar area was significant ( $\chi^2 = 11.0, P = 0.004$ ) (Table 3).

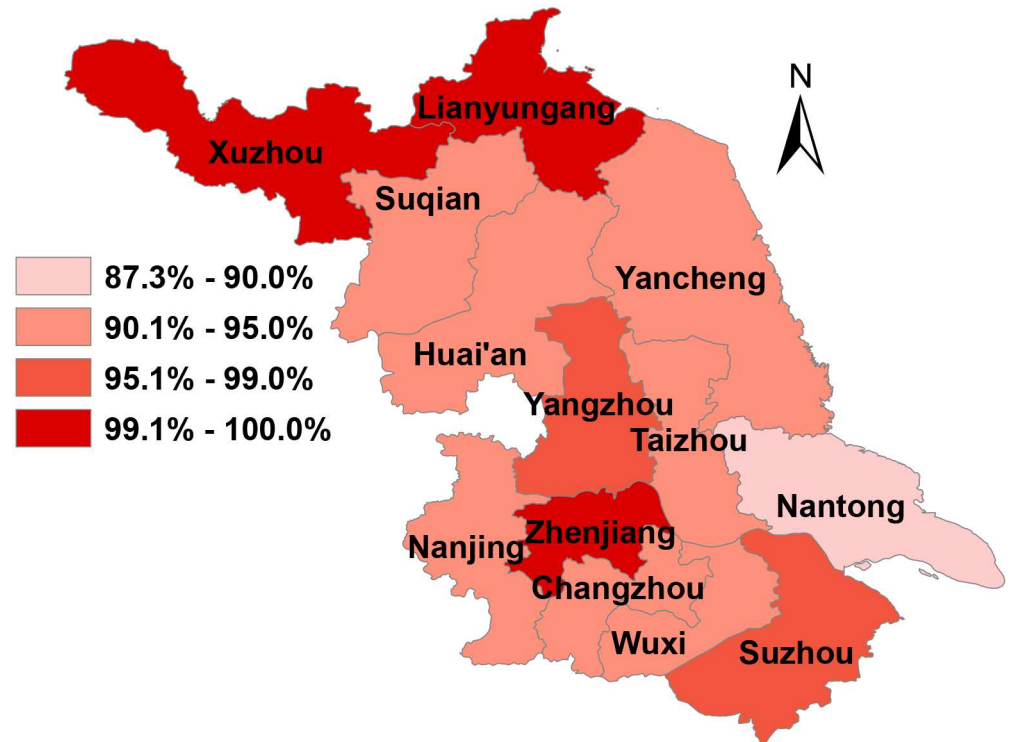

**Fig 2. The proportion of first-detected patients at HIV clinics and first-methadone users at methadone clinics who received free testing for syphilis in 2015.** Zhenjiang, Lianyungang and Xuzhou had the highest proportion (>99%), while Nantong had the lowest proportion (87.3%).

<https://doi.org/10.1371/journal.pone.0183409.g002>

90.0% (927/1030) of live babies born to syphilis-positive mothers in urban areas and 80.4% (218/271) of live babies born to syphilis-positive mothers in rural areas received services through standardized diagnostic and treatment programs. The difference among the dissimilar area was significant ( $\chi^2 = 11.5, P = 0.003$ ) (Table 3). 93.3% (938/1005) of live babies born to syphilis-positive mothers and aged over 12 month in 2015 received follow-up for syphilis during their first year of life.

### Standardized treatment and monitoring for syphilis positive patients

A total of 6345 syphilis treatment prescriptions were reviewed. 92.2% of syphilis patients received penicillin treatment. All 13 cities surveyed in Jiangsu province reached the national standard for penicillin treatment ( $\geq 80\%$ ) in 2015.

A total of 9648 reported syphilis cases were examined in this study, and we regarded syphilis case as correctly diagnosis in condition that patient record was fully featured and patient had been tested positive for both treponema pallidum serum test and non-treponema pallidum serum test. 97.2% of reported cases from medical institutions surveyed were accurate. Accuracy rates exceeded 90% in all 13 cities.

### Discussion

This study evaluates the current status of syphilis prevention and treatment in Jiangsu province. The results suggest that Jiangsu performs well on public education, monitoring and detection of syphilis in high risk populations, prevention of mother-to-child syphilis transmission, and treatment and follow-up for syphilis patients. The incidence of syphilis decreased



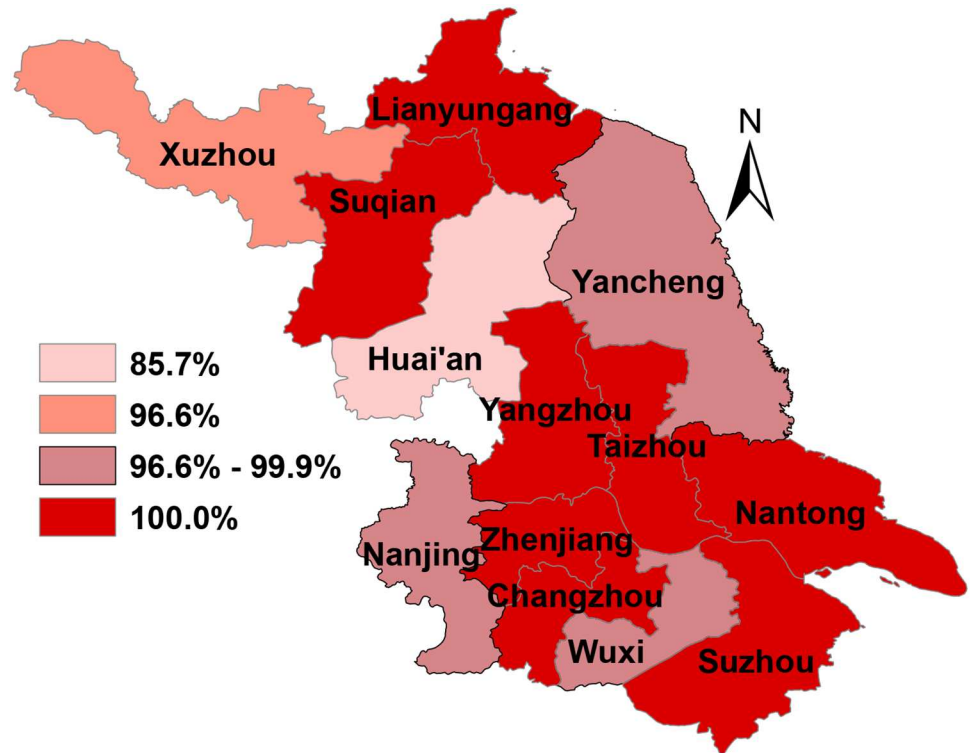

**Fig 3. The proportion of first-detected patients at HIV clinics and first-methadone users at methadone clinics with positive syphilis tests who were referred for specialized follow-up treatment in 2015 in Jiangsu province.** Lianyungang, Suqian, Yangzhou, Taizhou, Zhenjiang, Changzhou, Suzhou, and Nantong had the highest proportion (100%), while Huai'an had the lowest proportion (85.7%).

<https://doi.org/10.1371/journal.pone.0183409.g003>

from 2010 (32.3 per 100,000) to 2015(30.1 per 100,000), and by 2015, the incidence of syphilis was relatively lower than Guangdong province (52.55 per 100,000 in 2014) [14] but higher than Yunnan province (27.69 per 100,000 in 2014) [15].

The proportion of patients in STD clinics who received PISTC services was only 47.8% in the fourth quarter of 2015 in Jiangsu province, which is only slightly higher than in Guangdong

**Table 3. Test and treatment among pregnant women and babies born to syphilis-positive mothers in urban area and rural area in Jiangsu, China 2015.**

| Index                                                                                                        | South Jiangsu <sup>a</sup> |             | Center Jiangsu <sup>b</sup> |             | North Jiangsu <sup>c</sup> |             |
|--------------------------------------------------------------------------------------------------------------|----------------------------|-------------|-----------------------------|-------------|----------------------------|-------------|
|                                                                                                              | Urbanareas                 | Rural areas | Urbanareas                  | Rural areas | Urban areas                | Rural areas |
| 1. Percentage of pregnant women who received a free syphilis test (n = 797712)                               | 99.9                       | 99.9        | 99.3                        | 100.0       | 99.8                       | 99.6        |
| 2. Percentage of syphilis-positive pregnant women who received standardized services (n = 1348)              | 89.0                       | 76.0        | 96.0                        | 87.2        | 91.5                       | 82.1        |
| 3. Percentage of babies born to syphilis-positive mothers who received standard treatment services(n = 1301) | 86.8                       | 93.3        | 95.9                        | 92.1        | 91.7                       | 71.5        |

<sup>a</sup>: South Jiangsu includes Nanjing city, Zhenjiang city, Suzhou city, Wuxi city and Changzhou city;

<sup>b</sup>: Central Jiangsu includes Yangzhou city, Taizhou city and Nantong city;

<sup>c</sup>: North Jiangsu includes Xuzhou city, Lianyungang city, Suqian city, Huai'an city and Yancheng city.

<https://doi.org/10.1371/journal.pone.0183409.t003>

province (40% in 2014) [16]. Previous research has demonstrated that among outpatients at STD clinics, 19.0%~24.6% percent of patients will test positive for syphilis [17–19]. Hospital dermatology and STD clinics serve as an important line of defense for identifying patients at high risk of syphilis [20]. Medical institutions should promote PISTC services; especially they were among the institutions where PISTC services were offered to fewer than 80% of all patients. In particular, clinicians at these institutions should receive more extensive training in syphilis prevention knowledge and PISTC services. At the same time, we should improve patient education so that patients feel comfortable seeking help from healthcare providers after unsafe sex [21].

Prevention of MTCT of syphilis is a major issue worldwide [22–25]. Nearly one million pregnant women worldwide are infected with syphilis each year [26]. Antenatal syphilis screening and treatment has been shown to prevent mortality and morbidity. In 2011, the Chinese MOH launched a successful national prevention and control program to address MTCT of HIV, syphilis and hepatitis B. Afterwards, the reported incidence of congenital syphilis dropped from 79.12 cases per 100,000 live births in 2011 to 40.74 cases per 100,000 live births in 2015 [27]. The reported incidence of congenital syphilis was 28.3 cases per 100,000 live births in Jiangsu province in 2015, decreased from 64.1 cases per 100,000 in 2010, and below the national average.

In general, primary and secondary syphilis are together referred to as early cases, which are highly infective and reflect the epidemiological status of syphilis. If primary and secondary syphilis were diagnosed early and treated systematically, the transmission of syphilis could be stopped altogether [28–29]. Our study found that the reported incidence rate of primary and secondary syphilis has declined at an annual rate of 7% from 2010 to 2015 in Jiangsu province. However, this is still far higher than the incidence of primary and secondary syphilis in the United States (5.3 per 100,000 in 2013) [30]. The distribution of primary and secondary syphilis is strongly affected by many social and demographic factors, including age, education, economy, and local funding to prevent and control syphilis [31]. Further studies are needed to understand the social and behavioral factors driving the spread of syphilis in Jiangsu province [32].

This study has several limitations. First, although we can suggest some reasons for the low rates of PISTC in hospitals, we cannot draw decisive conclusions based on the evidence from our study. Further investigation is needed to determine the factors associated with low PISTC rates. Secondly, given the sheer volume of data, we only collected and analyzed surveillance data from 2015, and thus cannot offer comparisons between years to obtain information on dynamic changes. Third, the patient awareness survey of syphilis prevention and treatment did not take into account socio-demographic factors, and may be biased in favor of populations that are relatively well-informed or relatively poorly-informed. Additionally, for this survey, we did not identify populations who fell into more than one category, such as rural-to-urban migrants who were also female sex workers, even though these two populations often overlap.

## Conclusion

This study reports the current status of syphilis prevention and control in Jiangsu province, China. The incidence of syphilis has decreased in recent years, but remains at a high level. Our study can help inform current and future policies on syphilis prevention and control. It is essential to promote PISTC services and improve public knowledge of syphilis in order to control the transmission and spread of syphilis in Jiangsu province.

## Supporting information

**S1 Table. Test questions of syphilis prevention, diagnosis and treatment and laboratory.**  
(DOC)

**S2 Table. Questionnaire about syphilis prevention knowledge.**  
(DOC)

**S3 Table. Survey on provider-initiated syphilis testing and counseling (PISTC) services in STD clinics.**  
(DOC)

**S4 Table. Survey on the ratio of syphilis-positive patients who had received standard treatment.**  
(DOC)

## Acknowledgments

We would like to thank all the personnel who helped us to collect material for our study in Jiangsu province. Thanks Katherine Li for providing English proof for this manuscript.

## Author Contributions

**Conceptualization:** Hong-Jing Yan, Guo-Hong Chen, Wei-Ming Tang, Geng-Feng Fu.

**Data curation:** Yuan-Fang Chen, Guo-Hong Chen, Geng-Feng Fu.

**Formal analysis:** Yuan-Fang Chen, Wei-Ming Tang.

**Investigation:** Yuan-Fang Chen, Jian-Ping Ding, Hong-Jing Yan, Ping Ding, Geng-Feng Fu.

**Methodology:** Yuan-Fang Chen, Jian-Ping Ding, Hai-Tao Yang, Geng-Feng Fu.

**Project administration:** Yuan-Fang Chen, Geng-Feng Fu.

**Resources:** Yuan-Fang Chen, Geng-Feng Fu.

**Software:** Yuan-Fang Chen, Jing Lu, Jian-Jun Li, Geng-Feng Fu.

**Supervision:** Yuan-Fang Chen, Jing Lu, Ping Ding, Xi-Ping Huan, Geng-Feng Fu.

**Validation:** Yuan-Fang Chen, Jian-Jun Li, Xi-Ping Huan, Wei-Ming Tang, Geng-Feng Fu.

**Visualization:** Yuan-Fang Chen, Xi-Ping Huan, Hai-Tao Yang, Geng-Feng Fu.

**Writing – original draft:** Yuan-Fang Chen, Wei-Ming Tang, Geng-Feng Fu.

**Writing – review & editing:** Yuan-Fang Chen, Geng-Feng Fu.

## References

1. Media centre. World Health Organization(WHO): Sexually transmitted infections (STIs). 2016. <http://www.who.int/mediacentre/factsheets/fs110/en/>
2. Champredon D, Cameron CE, Smieja M, Dushoff J. Epidemiological impact of a syphilis vaccine: a simulation study. *Epidemiology and Infection*. 2016; 144(15):3244–3252. <https://doi.org/10.1017/S0950268816001643> PMID: 27477823
3. Fu GF, Jiang N, Hu HY, Tanmay M, Yin YP, Sanchita M, et al. The Epidemic of HIV, Syphilis, Chlamydia and Gonorrhoea and the Correlates of Sexual Transmitted Infections among Men Who Have Sex with Men in Jiangsu, China, 2009. *PLOS ONE*. 2015; 10(3):e0118863. <https://doi.org/10.1371/journal.pone.0118863> PMID: 25775451

4. Tang WM, Pan JC, Jiang N, Hu HY, Tanmay M, Yin YP, et al. Correlates of Chlamydia and Gonorrhea Infection among Female Sex Workers: The Untold Story of Jiangsu, China. *PLoS ONE*. 2014; 9(1): e85985. <https://doi.org/10.1371/journal.pone.0085985> PMID: 24454950
5. Ma P, Chen DL, Yuan JM. Survey on syphilis prevalence and its influence factors among three different groups in Nantong city. *Jiangsu Journal of Preventive Medicine*. 2012; 23(2):34–36. <https://doi.org/10.3969/j.issn.1006-9070.2012.02.013>
6. Xu JG, Mei ZF. Investigation on the prevalence of HIV, syphilis, HCV and HBV among the migrant workers in Yandu district of Yancheng city. *International Journal of Laboratory Medicine*. 2013; 34(23):3182–3183.
7. Han Y. investigation on Suzhou migrant works' syphilis and HIV infection and prevention knowledge. *Chinese journal of human sexuality*. 2013; 22(11):37–39,48. <https://doi.org/10.3969/j.issn.1672-1993.2013.11.011>
8. Yang HT, Tang W, Xiao ZP, Jiang N, Mahapatra T, Huan XP, et al. Worsening Epidemic of HIV and Syphilis Among Men Who Have Sex With Men in Jiangsu Province, China. *Clinical Infectious Diseases*. 2014; 58(12):1753–1759. <https://doi.org/10.1093/cid/ciu175> PMID: 24647017
9. Qin J, Yang T, Xiao S, Tan H, Feng T, Fu H. Reported Estimates of Adverse Pregnancy Outcomes among Women with and without Syphilis: A Systematic Review and Meta-Analysis. Rubens C, ed. *PLoS ONE*. 2014; 9(7):e102203. <https://doi.org/10.1371/journal.pone.0102203> PMID: 25025232
10. China Ministry of Health (2010) Notice of the Ministry of Health on Issuing National Program for Prevention and Control of Syphilis in China (2010–2020). The Central People's Government of the People's Republic of China. July, 2010. [http://www.gov.cn/gzdt/2010-06/21/content\\_1632301.htm](http://www.gov.cn/gzdt/2010-06/21/content_1632301.htm).
11. Chen XS, Yin YP, Wang QQ, Wang BX. Historical perspective of syphilis in the past 60 years in China: eliminated, forgotten, on the return. *Chin Med J*. 2013; 126(14):2774–2779. PMID: 23876912
12. Workowski KA, Berman SM. Sexually transmitted diseases treatment guidelines, 2006. *Morbidity and Mortality Weekly Report*. 2006; 55(11):1–94. PMID: 16888612
13. Fan SR, Liang LF(compilation). CDC 2015 Guideline for the Diagnosis and Treatment of Syphilis. *Chinese general practice*. 2015; 18(27):3260–3264.
14. Zhou YM, Liu FY, Chen L, Shen HC, Huang SJ, Zheng HP, et al. Epidemiological trend and disease burden of syphilis in Guangdong province, 2005–2014. *Journal of Sun Yat-sen University(Medical Sciences)*. 2016; 37(1):142–147.
15. Zhang WY, Guo Y, Fang QY, Yang ZF, Zhang XJ, Cui WQ, et al. Analysis of syphilis epidemic situation in Yunnan province from 2010 to 2014. *Journal of Dermatology and Venereology*. 2016; 38(1):1002–1310.
16. Shen H, Huang S, Wen M, Tan X, Feng L, Chen J, et al. Effect analysis of promoting HIV and syphilis testing in Jiangmen, Guangdong. *Chin J AIDS STD*. 2016; 22(1):32–41.
17. Sun YP. Clinical study and analysis of syphilis detection in outpatient clinic. *Medical Information*, 2016; 29(9):285–285.
18. Zhao Y, Chen XJ. Investigation on syphilis detection among the clients of the out-patient clinic for STDS [J]. *Modern Preventive Medicine*, 2007; 34(10):1956–1958. <https://doi.org/10.3969/j.issn.1003-8507.2007.10.067>
19. Song X, Zhong WQ, Xie YG. Analysis of syphilis detection in outpatient clinic. *China Rural Health*, 2017; (03):59–60.
20. Huang SJ, Tang WM, Zhu ZJ, Lu HK, Tan XL, Zhang BY, et al. Higher Prevalence of Sexual Transmitted Diseases and Correlates of Genital Warts among Heterosexual Males Attending Sexually Transmitted Infection Clinics (MSCs) in Jiangmen, China: Implication for the Up-Taking of STD Related Service. Shang H, ed. *PLoS ONE*. 2015; 10(3):e0121814. <https://doi.org/10.1371/journal.pone.0121814> PMID: 25811185
21. Azeredo CM, Levy RB, Peres MFT, Menezes PR, Araya R. Patterns of health-related behaviors among adolescents: a cross-sectional study based on the National Survey of School Health Brazil 2012. *BMJ Open*. 2016; 6(11):e011571. <https://doi.org/10.1136/bmjopen-2016-011571> PMID: 28186927
22. Taylor MM, Zhang X, Nurse-Findlay S, Hedman L, Kiarie J. The amount of penicillin needed to prevent mother-to-child transmission of syphilis. *Bulletin of the World Health Organization*. 2016; 94(8):559–559A. <https://doi.org/10.2471/BLT.16.173310> PMID: 27516630
23. Wijesooriya NS, Rochat RW, Kamb ML, Turlapati P, Temmerman M, Broutet N, et al. Global burden of maternal and congenital syphilis in 2008 and 2012: a health systems modeling study. *Lancet Glob Health*. 2016; 4(8): e525–533. [http://dx.doi.org/10.1016/S2214-109X\(16\)30135-8](http://dx.doi.org/10.1016/S2214-109X(16)30135-8). PMID: 27443780
24. Xia JH, Rutherford S, Ma YZ, Wu L, Gao S, Chen TT, et al. Obstacles to the coordination of delivering integrated prenatal HIV, syphilis and hepatitis B testing services in Guangdong: using a needs

- assessment approach. *BMC Health Services Research*. 2015; 15:117. <https://doi.org/10.1186/s12913-015-0760-0> PMID: 25889645
25. Zhang JSF. Efficacy and effectiveness of 20 child health interventions in China: Systematic review of Chinese literature. *Journal of Global Health*. 2011; 1(1):87–95. PMID: 23198106
  26. Programs. World health organization(WHO): WHO validates elimination of mother-to-child transmission of HIV and syphilis in Thailand, Armenia, Belarus and the Republic of Moldova. 2016. <http://www.who.int/reproductivehealth/news/emtct-hiv-syphilis/en/>
  27. Wang J, Gong XD, Wu MZ, Zhao L. Mother-to-child transmission of syphilis. *Chin J Dermatol*. 2016; 49(5): 364–367. <https://doi.org/10.3760/cma.j.issn.0412-4030.2016.05.019>
  28. Wong NS, Huang S, Zheng H, Chen L, Zhao PZ, Toker JD, et al. Stages of syphilis in South China—a multilevel analysis of early diagnosis. *BMC Public Health*. 2017; 17:135–144. <https://doi.org/10.1186/s12889-016-4004-y> PMID: 28143448
  29. Wu X, Tucker JD, Hong F, Messina J, Lan L, Hu Y, et al. Multilevel and spatial analysis of syphilis in Shenzhen, China, to inform spatially targeted control measures. *Sexually transmitted infections*. 2012; 88(5):325–329. <https://doi.org/10.1136/sextrans-2011-050397> PMID: 22378936
  30. Patton ME, Su JR, Nelson R, Weinstock H. Primary and secondary syphilis—United States, 2005–2013. *MMWR Morb Mortal Wkly Rep*. 2014; 63(18):402–406. PMID: 24807239
  31. Hu YF, Sun ZQ, Hong FC, Lan LN, Pan P, Mo YS, et al. Spatial and temporal patterns of primary and secondary syphilis in Shenzhen, china. *Chin J Epidemiol*. 2010; 3(8):876–879. <https://doi.org/10.3760/cma.j.issn.0254-6450.2010.08.010>
  32. Tucker JD, Cohen MS. China's syphilis epidemic: epidemiology, proximate determinants of spread, and control responses. *Current opinion in infectious diseases*. 2011; 24(1):50–55. <https://doi.org/10.1097/QCO.0b013e32834204bf> PMID: 21150594
